# Supplementary material
Source: PubMed Central journal article supplement (PMC3486189)
Supplement: MCB.00651-12_zmb999109726so6.pdf [file MCB.00651-12_zmb999109726so6.pdf]

## SUPPLEMENTARY INFORMATION

### **The Loss of RGS Protein-G $\alpha_{i2}$ Interactions Results in Markedly Impaired Mouse Neutrophil Trafficking to Inflammatory Sites**

**Hyeseon Cho<sup>1#</sup>, Olena Kamenyeva<sup>1</sup>, Sunny Yung<sup>2</sup>, Ji-Liang Gao<sup>2</sup>, Il-Young Hwang<sup>1</sup>, Chung Park<sup>1</sup>, Philip M. Murphy<sup>2</sup>, Richard R. Neubig<sup>3</sup>, and John H. Kehrl<sup>1#</sup>**

<sup>1</sup>B-cell Molecular Immunology Section, Laboratory of Immunoregulation, National Institutes of Allergy and Infectious Diseases, National Institutes of Health<sup>2</sup>, Laboratory of Molecular Immunology, National Institutes of Allergy and Infectious Diseases, National Institutes of Health, <sup>3</sup>Department of Pharmacology, University of Michigan

<sup>#</sup>Corresponding authors. Mailing address: Laboratory of Immunoregulation, National Institute of Allergy and Infectious Diseases, National Institutes of Health, Bldg. 10, Room 11B08, 10 Center Dr. MSC 1876, Bethesda, MD 20892; Phone: 301-496-6363 for H. Cho, 301-443-6907 for J. Kehrl. Fax: 301-402-0070. E-mail: [hcho@niaid.nih.gov](mailto:hcho@niaid.nih.gov), [jkehrl@niaid.nih.gov](mailto:jkehrl@niaid.nih.gov)

Running Title: RGS proteins modulate neutrophil trafficking

#### Contents

1. Supplementary Figures 1 - 3
2. Video legends 1-5.

Supplementary Figures.

HCHO-Fig. S1

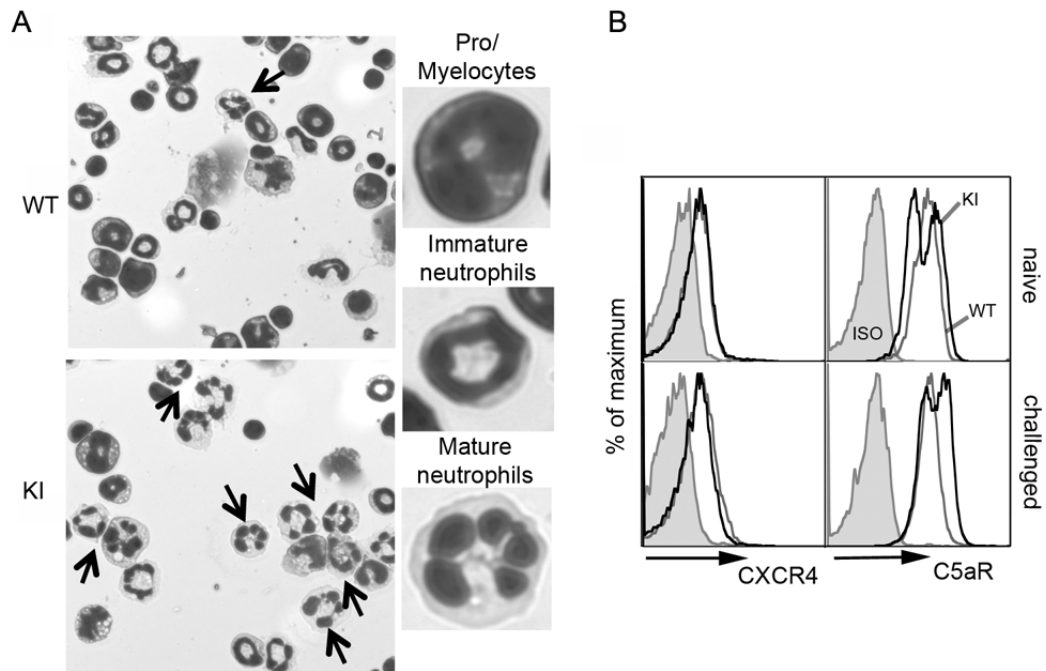

**Figure S1 Photomicrographs and surface receptor expression of BM cells.** (A) Representative photomicrographs of naïve BM cell cytopins. Cells were stained with Hema3. Arrows indicate mature neutrophils. Representative images of three BM neutrophil populations (promyelocytes/myelocytes, immature neutrophils, and mature neutrophils) are shown. (B) Expression of CXCR4 and C5aR on naïve or challenged BM neutrophils. 'ISO' represents neutrophils immunostained with isotype controls.

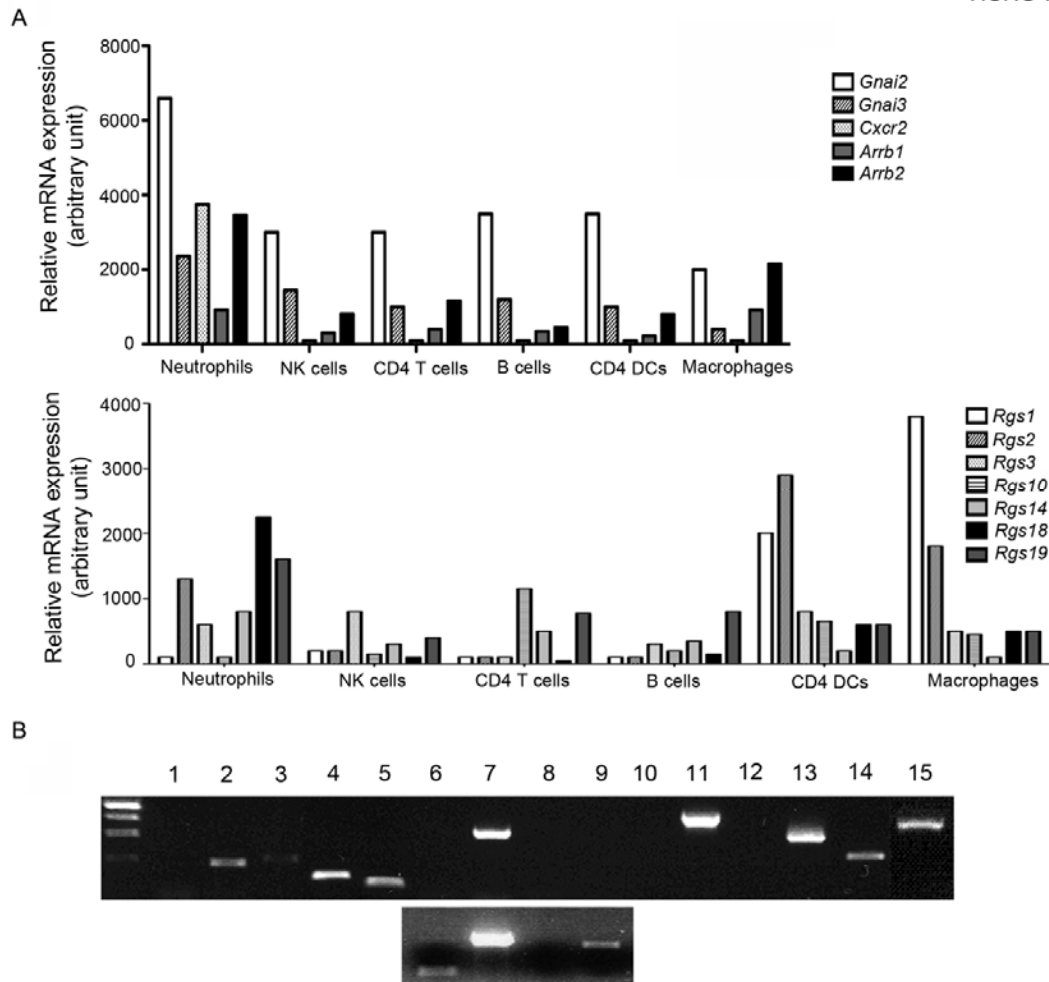

**Figure S2. Expression of various  $G\alpha$ ,  $\beta$ -arrestin, and RGS mRNAs in immune cells.** (A) Relative mRNA expression data were obtained from Microarray experiments <http://www.immgen.org/databrowsser/index.html>. (B) Semi-quantitative RT PCR was performed with sorted BM Gr-1<sup>+</sup>CD11b<sup>+</sup> cells. A representative PCR result from two independent sorting experiments is shown. The PCR primers used were described previously (29, 30). 1- $G\alpha_{i1}$ , 2- $G\alpha_{i2}$ , 3- $G\alpha_{i3}$ , 4- $G\alpha_q$ , 5- $G\alpha_s$ , 6-RGS1, 7-RGS2, 8-RGS3L, 9-RGS10, 10-RGS13, 11-RGS14, 12-RGS16, 13-RGS19, 14-actin, 15-RGS18. Lower panel shows a longer exposure, indicating a low expression of RGS1 and RGS10 mRNAs.  $G\alpha_{i1}$ , RGS3L, RGS13, and RGS16 mRNAs were not detected and therefore not shown.

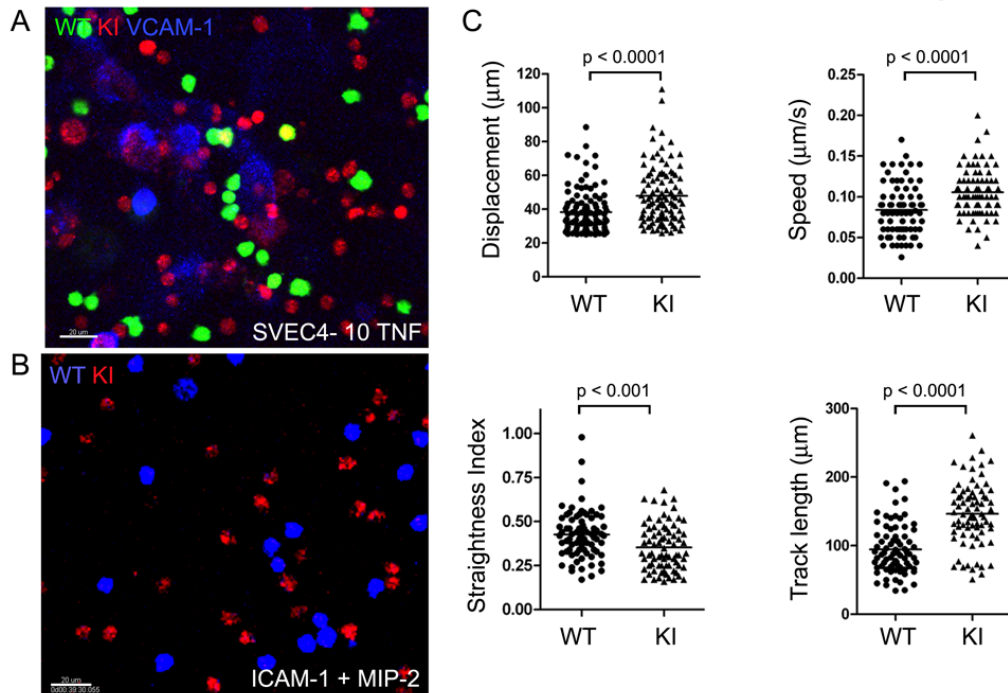

**Figure S3. Adhesion of WT and KI neutrophils.** (A) WT (green) and KI (red) bone marrow derived neutrophils adherent to a monolayer of SVEC4-10 cells previously treated with  $\text{TNF}\alpha$  (20 ng/ml) for 24 hours. The monolayer was immunostained with a VCAM-1 antibody (blue). Scale bar 20  $\mu\text{m}$ . (B) WT (blue) and KI (red) bone marrow derived neutrophils adherent to ICAM-1 and MIP-2 coated plate. Scale bar 20  $\mu\text{m}$ . (C) Motility parameters of WT and KI neutrophils adherent to ICAM-1 + MIP-2 coated plates. Cells tracked every 10 seconds for 20 minutes using tracking function in Imaris.

## Supplementary videos.

**Video 1.** Imaging WT and KI neutrophils part I. Adoptively transferred wild type (green) and KI (red) neutrophils in the ear of a wild type mouse. Images were taken for 42 minutes following laser damage. An image sequence of a 30  $\mu\text{m}$  z-projection was acquired with 20x lens at a scanning speed of 17 second between frames. Collagen is blue. Frame rate is 20 frames/second.

**Video 2.** Imaging WT and KI neutrophils part II. Adoptively transferred wild type (green) and KI (red) neutrophils in the ear of a wild type mouse. Images were taken 45-104 minutes following laser damage. An image sequence of a 30  $\mu\text{m}$  z-projection was acquired with 20x lens at a scanning speed of 17 second between frames. Collagen is blue. Frame rate is 20 frames/second.

**Video 3.** Imaging neutrophils in the ear of a LysM-EGFP WT mouse. Images were taken between 40-106 minutes following laser damage. An image sequence of a 30  $\mu\text{m}$  z-projection was acquired with 20x lens at a scanning speed of 18 second between frames. Collagen is blue. Frame rate is 20 frames/second.

**Video 4.** Imaging neutrophils in the ear of a LysM-EGFP  $G\alpha_{i2}^{G184S/WT}$  mouse. Images were taken for 40-106 minutes following laser damage. An image sequence of a 30  $\mu\text{m}$  z-projection was acquired with 20x lens at a scanning speed of 18 second between frames. Collagen is blue. Frame rate is 20 frames/second.

**Video 5.** Imaging neutrophils in the ear of a LysM-EGFP  $G\alpha_{i2}^{G184S/G184S}$  KI mouse. Images were taken for 50-100 minutes following laser damage. An image sequence of a 30  $\mu\text{m}$  z-projection was acquired with 20x lens at a scanning speed of 18 second between frames. Blood vessels were outlined by infusing fluorescent Qdot 655 nanocrystals prior to imaging. Collagen is blue. Frame rate is 20 frames/second.
